# Supplementary material for: A global metagenomic map of urban microbiomes and antimicrobial resistance
Source: PubMed Central journal article supplement (PMC8238498; doi:10.1016/j.cell.2021.05.002), 2021-06-24
Supplement: mmc1.pdf [file mmc1.pdf]

## Supplemental information

### A global metagenomic map of urban microbiomes and antimicrobial resistance

David Danko, Daniela Bezdán, Evan E. Afshin, Sofia Ahsanuddin, Chandrima Bhattacharya, Daniel J. Butler, Kern Rei Chng, Daisy Donnellan, Jochen Hecht, Katelyn Jackson, Katerina Kuchin, Mikhail Karasikov, Abigail Lyons, Lauren Mak, Dmitry Meleshko, Harun Mustafa, Beth Mutai, Russell Y. Neches, Amanda Ng, Olga Nikolayeva, Tatyana Nikolayeva, Eileen Png, Krista A. Ryon, Jorge L. Sanchez, Heba Shaaban, Maria A. Sierra, Dominique Thomas, Ben Young, Omar O. Abudayyeh, Josue Alicea, Malay Bhattacharyya, Ran Blekhman, Eduardo Castro-Nallar, Ana M. Cañas, Aspasia D. Chatziefthimiou, Robert W. Crawford, Francesca De Filippis, Youping Deng, Christelle Desnues, Emmanuel Dias-Neto, Marius Dybwad, Eran Elhaik, Danilo Ercolini, Alina Frolova, Dennis Gankin, Jonathan S. Gootenberg, Alexandra B. Graf, David C. Green, Iman Hajirasouliha, Jaden J.A. Hastings, Mark Hernandez, Gregorio Iraola, Soojin Jang, Andre Kahles, Frank J. Kelly, Kaymisha Knights, Nikos C. Kyrpides, Paweł P. Łabaj, Patrick K.H. Lee, Marcus H.Y. Leung, Per O. Ljungdahl, Gabriella Mason-Buck, Ken McGrath, Cem Meydan, Emmanuel F. Mongodin, Milton Ozorio Moraes, Niranjana Nagarajan, Marina Nieto-Caballero, Houtan Noshmehr, Manuela Oliveira, Stephan Ossowski, Olayinka O. Osulale, Orhan Özcan, David Paez-Espino, Nicolás Rascovan, Hugues Richard, Gunnar Räscher, Lynn M. Schriml, Torsten Semmler, Osman U. Sezerman, Leming Shi, Tielu Shi, Rania Siam, Le Huu Song, Haruo Suzuki, Denise Syndercombe Court, Scott W. Tighe, Xinzhao Tong, Klas I. Udekwu, Juan A. Ugalde, Brandon Valentine, Dimitar I. Vassilev, Elena M. Vayndorf, Thirumalaisamy P. Velavan, Jun Wu, María M. Zambrano, Jifeng Zhu, Sibozhu, Christopher E. Mason, and The International MetaSUB Consortium

Table S1: Sample Counts by City, Related to Table 1.

| Region      | city         | Pilot        | CSD16 | CSD17 | Other | Total |
|-------------|--------------|--------------|-------|-------|-------|-------|
| East Asia   | Region Total | 34.0         | 26.0  | 1300  | 0     | 1357  |
|             | Fukuoka      | 0.0          | 0.0   | 3     | 0     | 158   |
|             | Hanoi        | 0.0          | 0.0   | 16    | 0     | 16    |
|             | Hong Kong    | 12.0         | 0.0   | 712   | 0     | 724   |
|             | Kuala Lumpur | 0.0          | 0.0   | 30    | 0     | 30    |
|             | Sendai       | 0.0          | 0.0   | 32    | 0     | 32    |
|             | Seoul        | 12.0         | 0.0   | 80    | 0     | 92    |
|             | Shanghai     | 10.0         | 0.0   | 0     | 0     | 10    |
|             | Singapore    | 0.0          | 0.0   | 192   | 0     | 192   |
|             | Taipei       | 0.0          | 0.0   | 94    | 0     | 94    |
|             | Tokyo        | 0.0          | 26.0  | 132   | 0     | 158   |
|             | Yamaguchi    | 0.0          | 0.0   | 9     | 0     | 9     |
|             | Europe       | Region Total | 177.0 | 310.0 | 939   | 1     |
| Barcelona   |              | 25.0         | 99.0  | 0     | 0     | 124   |
| Belfast     |              | 0.0          | 0.0   | 5     | 0     | 5     |
| Berlin      |              | 0.0          | 55.0  | 1     | 0     | 56    |
| Birmingham  |              | 0.0          | 0.0   | 5     | 1     | 6     |
| Bradford    |              | 0.0          | 0.0   | 4     | 0     | 4     |
| Bury        |              | 0.0          | 0.0   | 6     | 0     | 6     |
| Eastbourne  |              | 0.0          | 0.0   | 6     | 0     | 6     |
| Eden        |              | 0.0          | 0.0   | 5     | 0     | 5     |
| Edinburgh   |              | 0.0          | 0.0   | 6     | 0     | 6     |
| Islington   |              | 0.0          | 0.0   | 5     | 0     | 5     |
| Jaywick     |              | 0.0          | 0.0   | 6     | 0     | 6     |
| Kensington  |              | 0.0          | 0.0   | 6     | 0     | 6     |
| Kyiv        |              | 0.0          | 0.0   | 97    | 0     | 97    |
| Lands End   |              | 0.0          | 0.0   | 5     | 0     | 5     |
| Lisbon      |              | 28.0         | 60.0  | 0     | 0     | 88    |
| London      |              | 0.0          | 0.0   | 534   | 0     | 534   |
| Marseille   |              | 0.0          | 96.0  | 16    | 0     | 112   |
| Naples      |              | 0.0          | 0.0   | 16    | 0     | 16    |
| Newcastle   |              | 0.0          | 0.0   | 5     | 0     | 5     |
| Oslo        |              | 12.0         | 0.0   | 16    | 0     | 28    |
| Paris       |              | 0.0          | 0.0   | 16    | 0     | 16    |
| Porto       |              | 112.0        | 0.0   | 0     | 0     | 112   |
| Sofia       | 0.0          | 0.0          | 16    | 0     | 16    |       |
| Stockholm   | 0.0          | 0.0          | 62    | 0     | 62    |       |
| Swansea     | 0.0          | 0.0          | 6     | 0     | 6     |       |
| Vienna      | 0.0          | 0.0          | 16    | 0     | 16    |       |
| Zurich      | 0.0          | 0.0          | 79    | 0     | 79    |       |
| Middle East | Region Total | 0.0          | 100.0 | 15    | 0     | 115   |
|             | Doha         | 0.0          | 100.0 | 15    | 0     | 115   |

| continent          | project city   | Pilot | CSD16 | CSD17 | Other | Total |
|--------------------|----------------|-------|-------|-------|-------|-------|
| North America      | Region Total   | 28.0  | 284.0 | 371   | 276   | 959   |
|                    | Baltimore      | 0.0   | 0.0   | 23    | 0     | 23    |
|                    | Denver         | 0.0   | 24.0  | 23    | 0     | 47    |
|                    | Fairbanks      | 0.0   | 141.0 | 0     | 0     | 141   |
|                    | Mexico City    | 10.0  | 0.0   | 0     | 0     | 10    |
|                    | Minneapolis    | 0.0   | 0.0   | 16    | 0     | 16    |
|                    | New York City  | 0.0   | 103.0 | 279   | 276   | 658   |
|                    | Sacramento     | 18.0  | 16.0  | 0     | 0     | 34    |
|                    | San Francisco  | 0.0   | 0.0   | 30    | 0     | 30    |
|                    | Region Total   | 0.0   | 94.0  | 32    | 0     | 126   |
| Oceania            | Auckland       | 0.0   | 16.0  | 0     | 0     | 16    |
|                    | Brisbane       | 0.0   | 0.0   | 16    | 0     | 16    |
|                    | Hamilton       | 0.0   | 16.0  | 0     | 0     | 16    |
|                    | Honolulu       | 0.0   | 0.0   | 16    | 0     | 16    |
|                    | Sydney         | 0.0   | 62.0  | 0     | 0     | 62    |
|                    | Region Total   | 20.0  | 44.0  | 199   | 68    | 331   |
| South America      | Bogota         | 0.0   | 17.0  | 0     | 0     | 17    |
|                    | Montevideo     | 20.0  | 0.0   | 0     | 0     | 20    |
|                    | Ribeirao Preto | 0.0   | 0.0   | 93    | 0     | 93    |
|                    | Rio De Janeiro | 0.0   | 0.0   | 77    | 68    | 145   |
|                    | Santiago       | 0.0   | 27.0  | 0     | 0     | 27    |
|                    | Sao Paulo      | 0.0   | 0.0   | 29    | 0     | 29    |
|                    | Region Total   | 0.0   | 116.0 | 192   | 0     | 308   |
| Sub Saharan Africa | Ilorin         | 0.0   | 90.0  | 134   | 0     | 224   |
|                    | Offa           | 0.0   | 26.0  | 58    | 0     | 84    |
|                    | Region Total   | 0.0   | 116.0 | 192   | 0     | 308   |

Table S2: Covariate Variance, Related to Figure 2. The sample variance that can be explained by each factor, in isolation.

| Factor                        | Variance Explained |
|-------------------------------|--------------------|
| City                          | 19%                |
| City Population Density       | 0%                 |
| City Ave June Temp            | 4%                 |
| City Elevation                | 2%                 |
| Coastal City                  | 1%                 |
| Surface Material              | 4%                 |
| Koppen Climate Classification | 8%                 |
| Setting                       | 2%                 |
| Above/Below Ground            | 7%                 |
| Continent                     | 11%                |
